# Supplementary material for: Effect of activation ratio on the characteristics of AC derived from anaerobic digester residue and its applications in supercapacitors
Source: Royal Society of Chemistry journal article supplement (doi:10.1039/c9ra09636a), 2020-01-01
Supplement: c9ra09636a1.pdf [file c9ra09636a1.pdf]

Supporting Information

Effect of activation ratio on the capacity of the carbon electrode of supercapacitors

Wentao Wu<sup>1</sup>, Lele Zhang<sup>1</sup>, Ce Wang<sup>1</sup>, Jin Wang<sup>1</sup>, Jiang Qian<sup>1</sup>, Shaomin Song<sup>2</sup>,

Zhengbo Yue<sup>1\*</sup>

1. School of Resources and Environmental Engineering, Hefei University of

Technology, Hefei, Anhui, China, 230009

2. Anhui Huawei New Energy Co., Ltd, Wuhu, Anhui, China, 241080

Corresponding Author:

Zhengbo Yue

Email: zbyue@hfut.edu.cn

Tel: 86-551-62901523;

Fax: 86-551-62901524;

## 1. XPS and TGA analysis of raw material

The TG-DTA curve of raw materials at nitrogen atmosphere is shown in Fig. S1(a). The heating rate is  $5\text{ }^{\circ}\text{C min}^{-1}$ , and the temperature range is  $25^{\circ}\text{C}$  to  $800^{\circ}\text{C}$ . Because the biogas residue contains water, the weight loss in the range of  $25^{\circ}\text{C}$  to  $250^{\circ}\text{C}$  is due to the evaporation of water, which absorbs a lot of heat. In the range of  $250^{\circ}\text{C}$  to  $500^{\circ}\text{C}$ , the organic matter in the biogas residue are pyrolyzed, leading to significant weight loss and absorbing a lot of heat at the same time. The mass slowly decreases in the range of  $500^{\circ}\text{C}$  to  $800^{\circ}\text{C}$ , which is mainly due to the carbonization of the humus decomposed difficultly as the temperature increases. In addition, N is retained because it is difficult to oxidize off the carbon skeleton without oxygen.

XPS survey spectra of raw material is showed in Fig. S1(b,c,d). The high-resolution C1s spectra of raw material was decomposed into three peaks at  $284.8\text{ eV}$ ,  $286.4\text{ eV}$  and  $288.2\text{ eV}$  and the functional group types are  $\text{C}=\text{C} / \text{C}-\text{C}$ ,  $\text{C}-\text{N}/\text{C}-\text{O}$  and  $\text{C}=\text{O}$ , respectively. The N1s spectrum can be deconvoluted into different kinds of nitrogen groups at  $399.55\text{ eV}$ ,  $400.16\text{ eV}$ , and  $400.53\text{ eV}$ , corresponding to the pyridinic N (N-6), pyrrolic/pyrydone N (N-5) and quaternary N (N-Q), respectively. The high resolution O1s spectrum of the samples, which can be deconvoluted into  $\text{C}=\text{O}$  ( $531.40\text{ eV}$ ),  $\text{C}-\text{O}-\text{C}$  ( $532.54\text{ eV}$ ) and  $\text{C}-\text{O}$  ( $533.25\text{ eV}$ ). Table S1 show the element composition of raw material by XPS, which is consistent with the results of TG-DTA analysis.

**Table S1.** Element composition of raw material by XPS

| sample       | C (wt%) | N (wt%) | O (wt%) |
|--------------|---------|---------|---------|
| raw material | 69.23   | 3.72    | 27.06   |

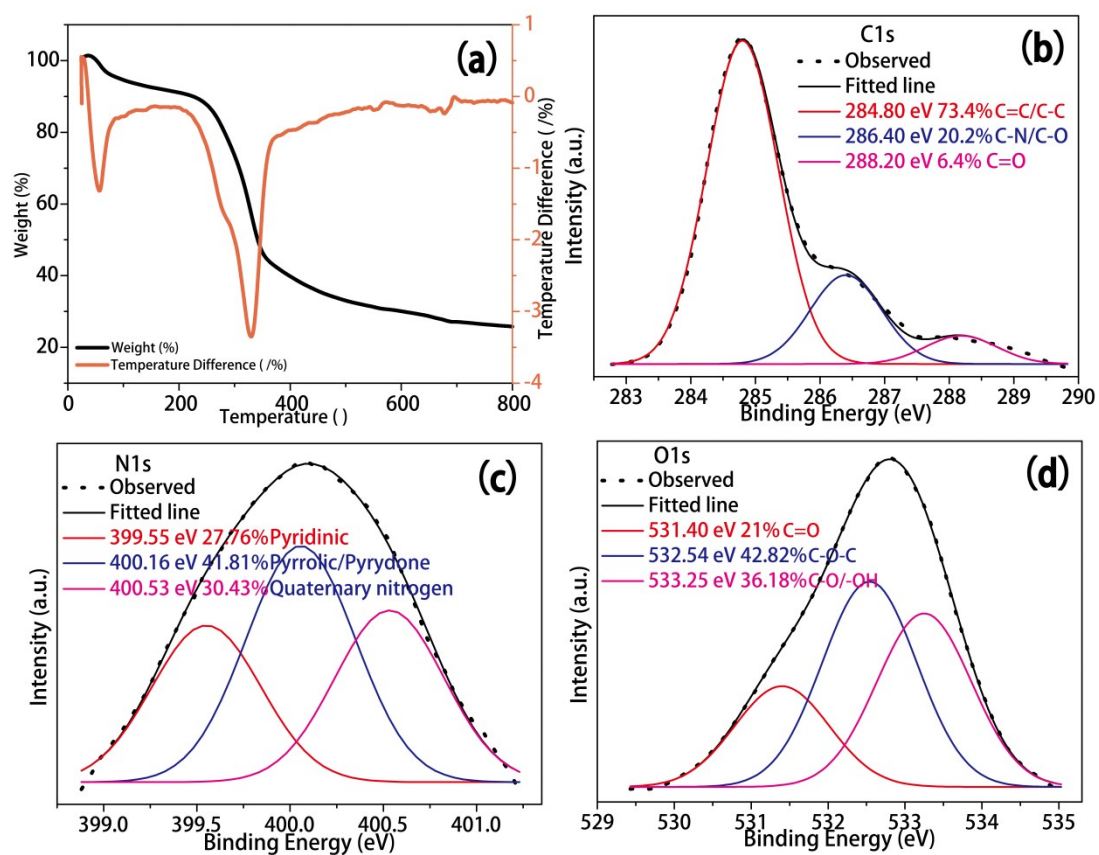

**Fig. S1** (a) TG-DTA curve of raw materials, (b) C1s, (c) N1s and (d) O1s spectra of raw materials

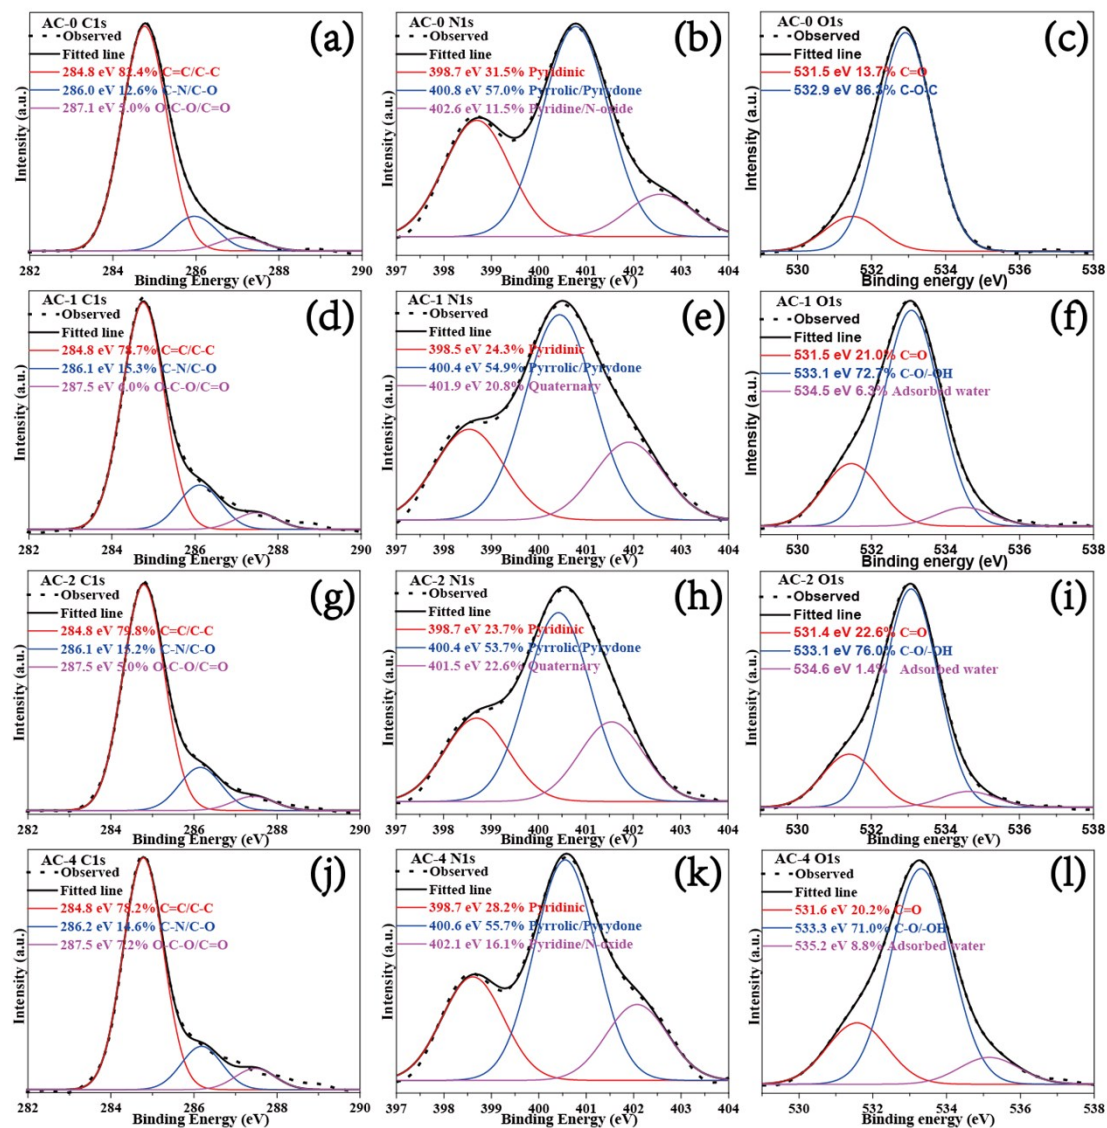

**Fig. S2** Deconvoluted high resolution XPS spectra of C1s, N1s and O1s for AC-0, AC-1, AC-2 and AC-4

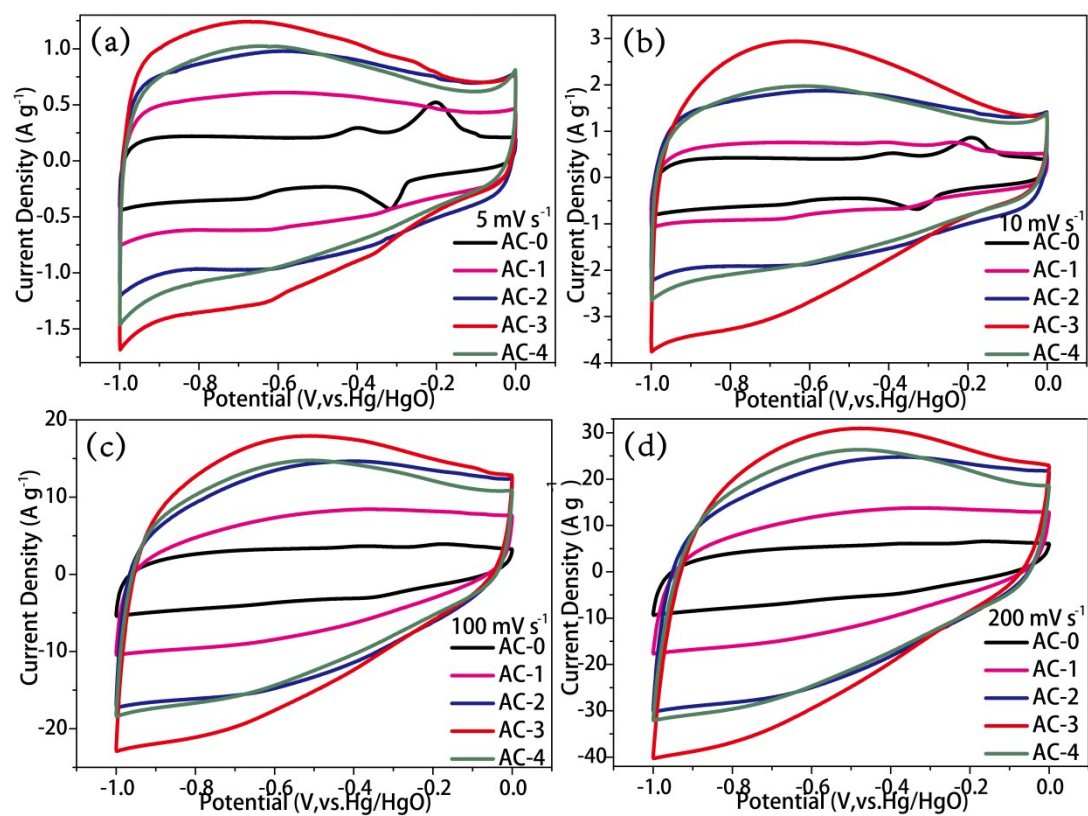

**Fig. S3** Cyclic voltammetry (CV) measurements of AC-0, AC-1, AC-2, AC-3 and AC-4 in 6 M KOH aqueous solution over a potential range from -1 to 0 V at a scan rate of (a) 5 mVs<sup>-1</sup>, (b) 10 mVs<sup>-1</sup>, (c) 100 mVs<sup>-1</sup> and (d) 200 mVs<sup>-1</sup>, respectively.

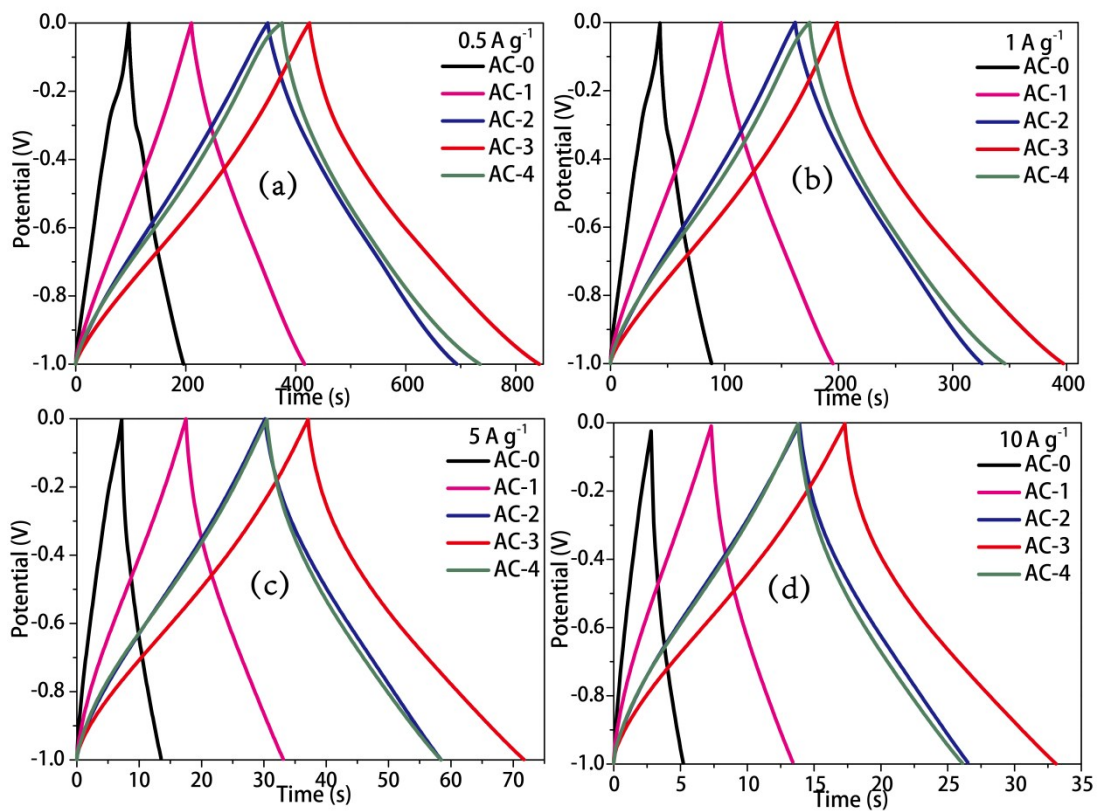

**Fig. S4** Galvanostatic charge/discharge curves of AC-0, AC-1, AC-2, AC-3 and AC-4

at a current density of (a) 0.5 A g<sup>-1</sup>, (b) 1 A g<sup>-1</sup>, (c) 5 A g<sup>-1</sup> and (d) 10 A g<sup>-1</sup>,

respectively.

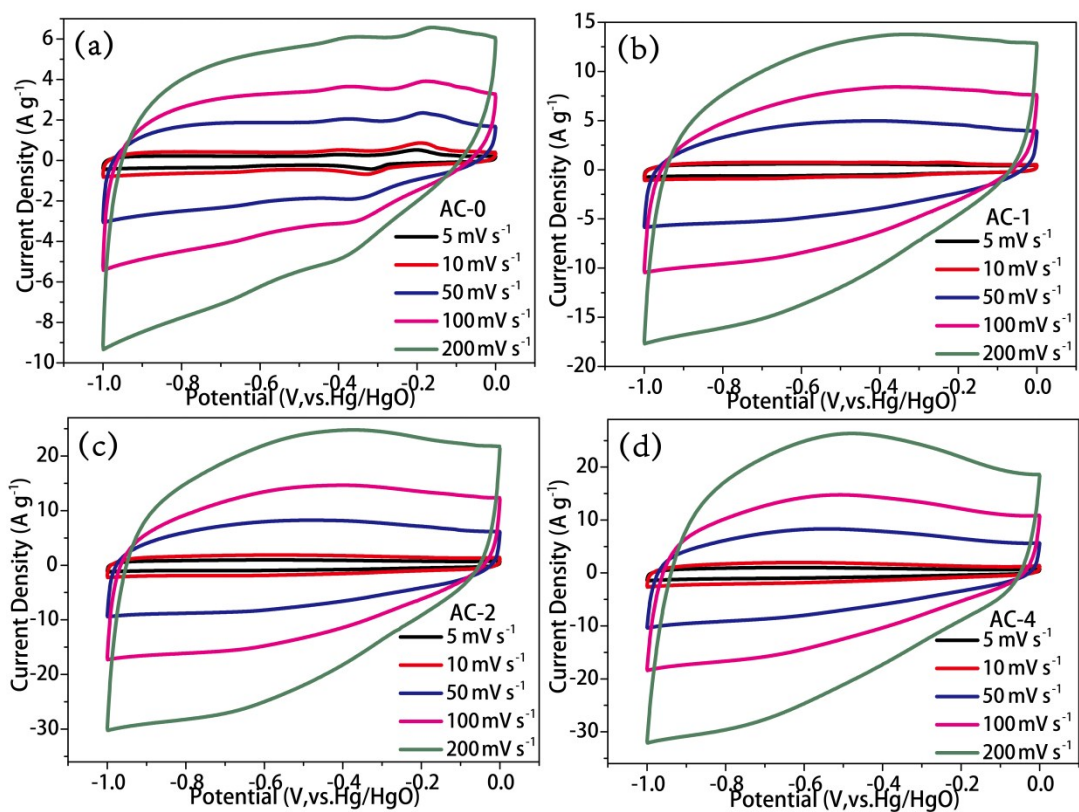

**Fig. S5** Cyclic voltammograms of (a) AC-0, (b) AC-1, (c) AC-2 and (c) AC-4 at scan rates of 5, 10, 50, 100 and 200  $\text{mVs}^{-1}$ , respectively.

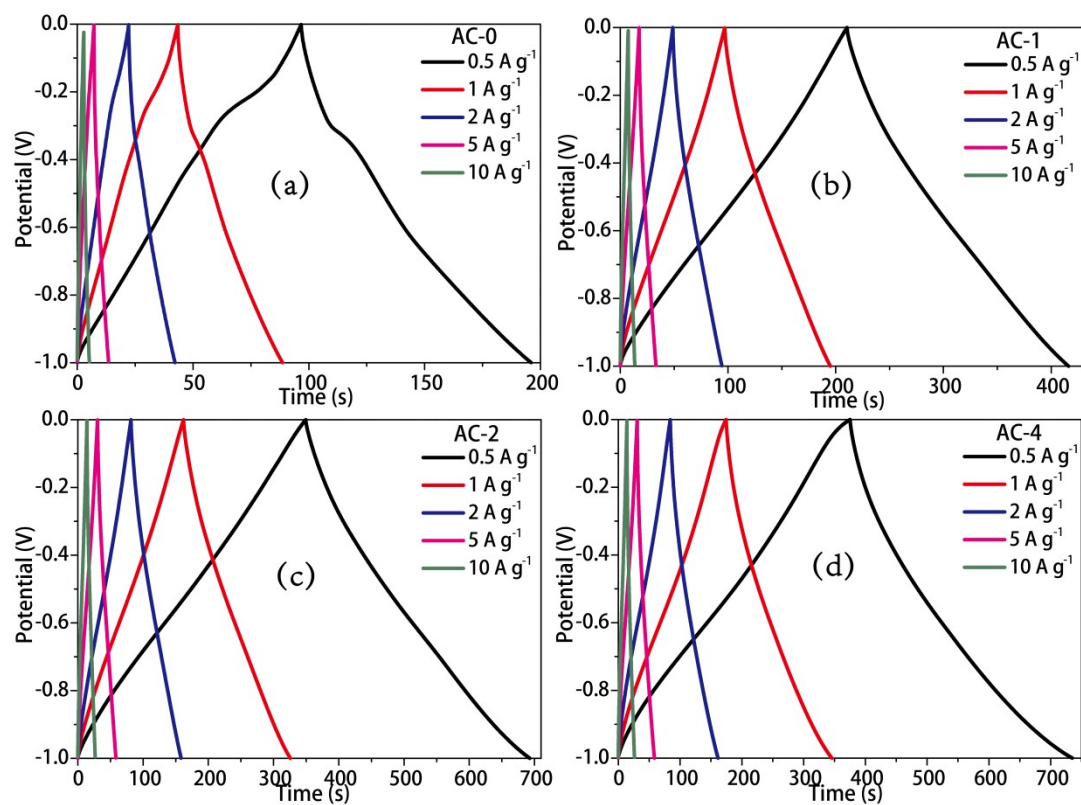

**Fig. S6** Galvanostatic charge/discharge curves of (a) AC-0, (b) AC-1, (c) AC-2 and (d)

AC-4 at current densities of 0.5, 1, 2, 5 and 10 A g<sup>-1</sup>, respectively.



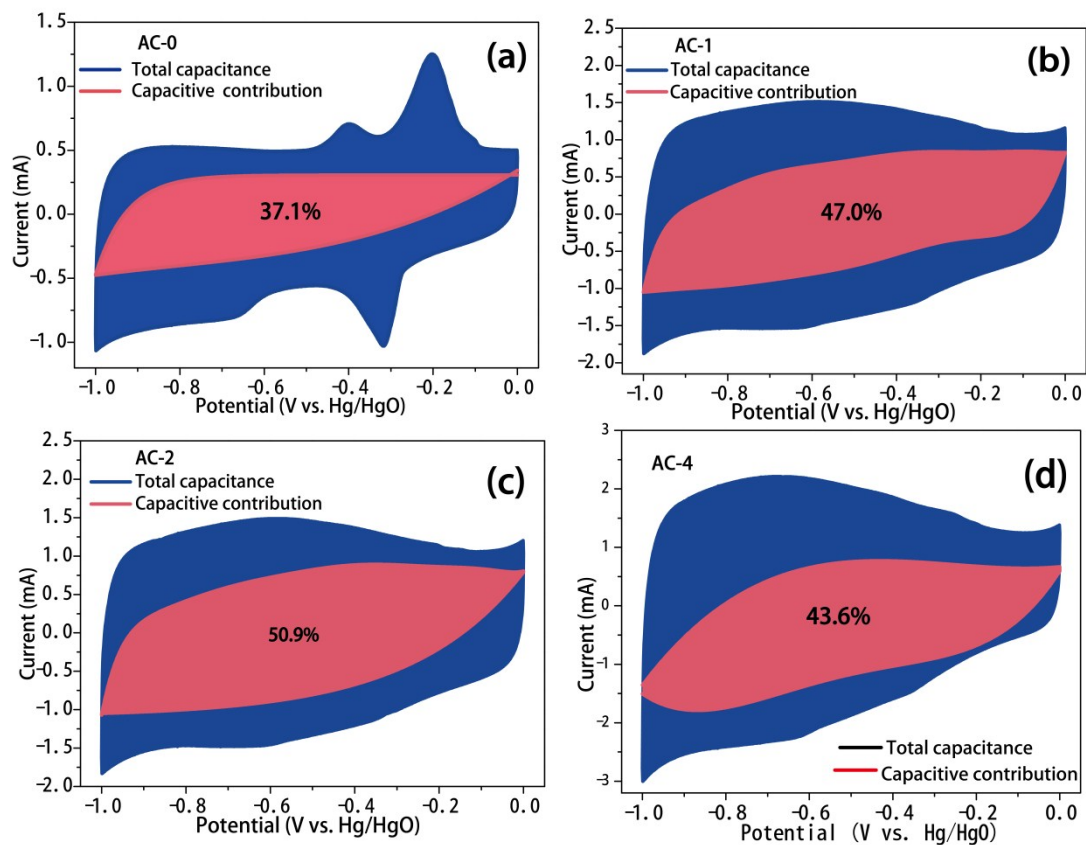

**Fig. S7** CV curves at a scan rate of  $5 \text{ mV s}^{-1}$  expressing the pseudocapacitance contribution of (a) AC-0, (b) AC-1, (c) AC-2 and (d) AC-4 to the total capacitance.
